# Supplementary material for: Assisted Extraction with Cyclodextrins as a Way of Improving the Antidiabetic Activity of Actinidia Leaves
Source: MDPI journal article supplement (doi:10.3390/pharmaceutics14112473), 2022-11-16
Supplement: s1 [file s1]

Article

# Assisted Extraction with Cyclodextrins as a Way of Improving the Antidiabetic Activity of *Actinidia* Leaves

Szymon Sip <sup>1</sup>, Anna Gościński <sup>1</sup>, Piotr Szulc <sup>2</sup>, Jarosław Walkowiak <sup>3</sup> and Judyta Cielecka-Piontek <sup>1,\*</sup>

<sup>1</sup> Department of Pharmacognosy, Faculty of Pharmacy, Poznań University of Medical Sciences, Rokietnicka 3, 60-806 Poznań, Poland

<sup>2</sup> Department of Agronomy, Poznań University of Life Sciences, Dojazd 11, 60-632 Poznań, Poland

<sup>3</sup> Department of Pediatric Gastroenterology and Metabolic Diseases, Poznań University of Medical Sciences, Szpitalna 27/33, 60-572 Poznań, Poland

\* Correspondence: jpiontek@ump.edu.pl

**Citation:** Sip, S.; Gościński, A.; Szulc, P.; Walkowiak, J.; Cielecka-Piontek, J. Assisted Extraction with Cyclodextrins as a Way of Improving the Antidiabetic Activity of *Actinidia* Leaves. *Pharmaceutics* **2022**, *14*, 2473. <https://doi.org/10.3390/pharmaceutics14112473>

Academic Editor: Maria Rosaria Lauro

Received: 2 October 2022

Accepted: 13 November 2022

Published: 16 November 2022

**Publisher's Note:** MDPI stays neutral with regard to jurisdictional claims in published maps and institutional affiliations.

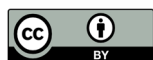

**Copyright:** © 2022 by the authors. Licensee MDPI, Basel, Switzerland. This article is an open access article distributed under the terms and conditions of the Creative Commons Attribution (CC BY) license (<https://creativecommons.org/licenses/by/4.0/>).

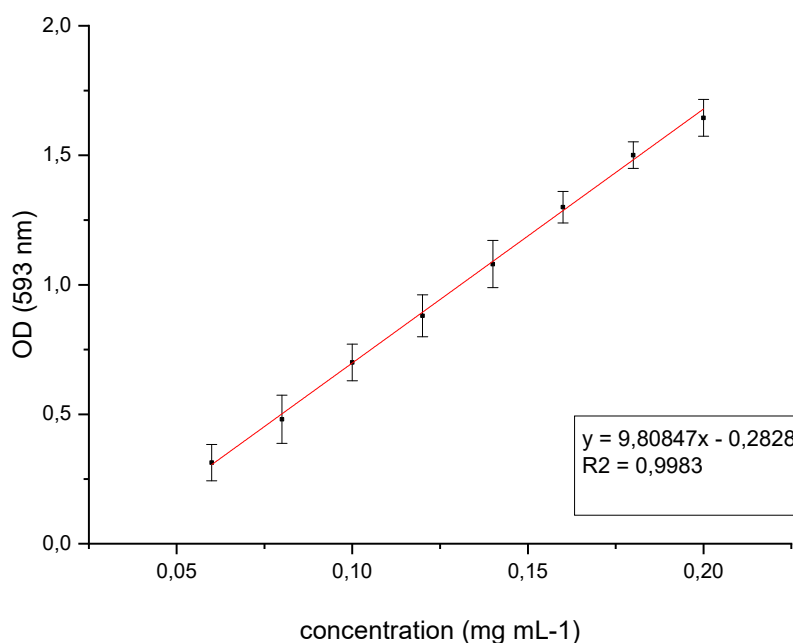

**Figure S1.** The calibration curve for gallic acid used to determine the TPC content

**Table S1.** Validation parameters of the chromatographic method

| <b>Chlorogenic Acid</b> |                                      |
|-------------------------|--------------------------------------|
| Calibration curve       | $y = 10\,183\,596,31x + 126\,385,99$ |
| $R^2$                   | 0,9988                               |
| <b>Rutin</b>            |                                      |
| Calibration curve       | $y = 20\,030\,315,16x + 27\,676,81$  |
| $R^2$                   | 0,9998                               |
| <b>Epicatechin</b>      |                                      |
| Calibration curve       | $y = 1\,587\,288,52x + 16\,618,20$   |
| $R^2$                   | 0,9991                               |
| <b>Kaempferol</b>       |                                      |
| Calibration curve       | $y = 34\,905\,644,67x - 20\,814,12$  |
| $R^2$                   | 0,9978                               |
| <b>Quercetin</b>        |                                      |
| Calibration curve       | $y = 53\,673\,865,16x - 30\,179,19$  |
| $R^2$                   | 0,9989                               |

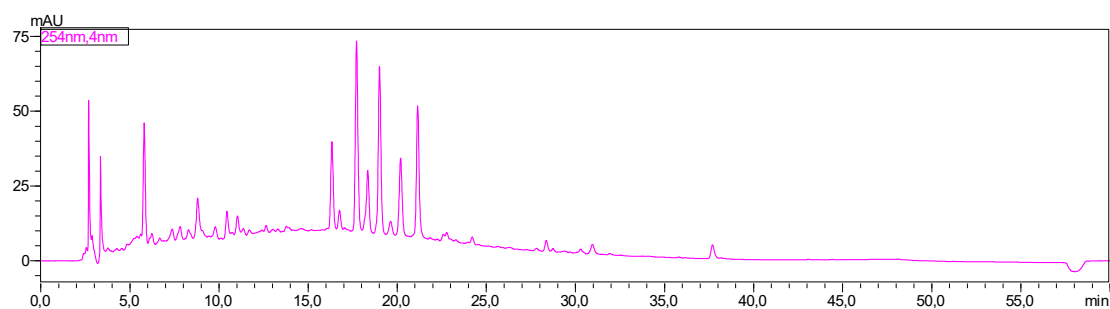**Figure S2.** Sample chromatogram for an extract - reading at 254 nm.
